# Supplementary material for: Stood-up drop to determine receding contact angles
Source: Royal Society of Chemistry journal article supplement (doi:10.1039/d5sm00985e), 2025-12-05
Supplement: d5sm00985e1.pdf [file d5sm00985e1.pdf]

## Supporting Information

### Stood-up drop to determine receding contact angles

Diego Díaz<sup>‡,a</sup>, Aman Bhargava<sup>‡,b</sup>, Franziska Walz<sup>c</sup>, Azadeh Sharifi<sup>c</sup>, Sajjad Summaly<sup>c</sup>, Rüdiger Berger<sup>c</sup>, Michael Kappl<sup>c</sup>, Hans-Jürgen Butt<sup>c</sup>, Detlef Lohse<sup>b,e</sup>, Thomas Willers<sup>\*d</sup>, Vatsal Sanjay<sup>\*b,f</sup> and Doris Vollmer<sup>\*c</sup>

<sup>a</sup> Dept. of Engineering Mechanics, KTH Royal Institute of Technology, 100 44 Stockholm, Sweden

<sup>b</sup> Physics of Fluids Department, Max Planck Center Twente for Complex Fluid Dynamics, Department of Science and Technology, University of Twente, P.O. Box 217, Enschede 7500 AE, The Netherlands

<sup>c</sup> Max Planck Institute for Polymer Research, Ackermannweg 10, 55128 Mainz, Germany

<sup>d</sup> KRÜSS GmbH, Wissenschaftliche Laborgeräte, Borsteler Chaussee 85, 22453 Hamburg, Germany

<sup>e</sup> Max Planck Institute for Dynamics and Self-Organisation, Am Fassberg 17, 37077 Göttingen, Germany

<sup>f</sup> CoMPhy Lab, Department of Physics, Durham University, Science Laboratories, South Road, Durham DH1 3LE, United Kingdom

#### 1. Stood-up drop (SUD) for a hydrophobic surface

(a)

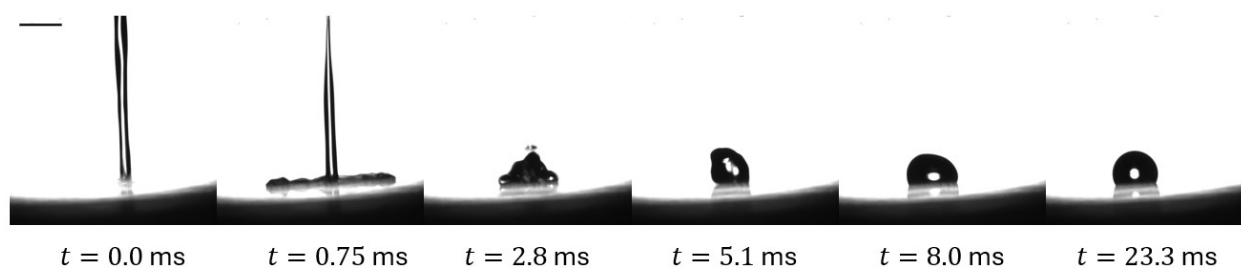

(b)

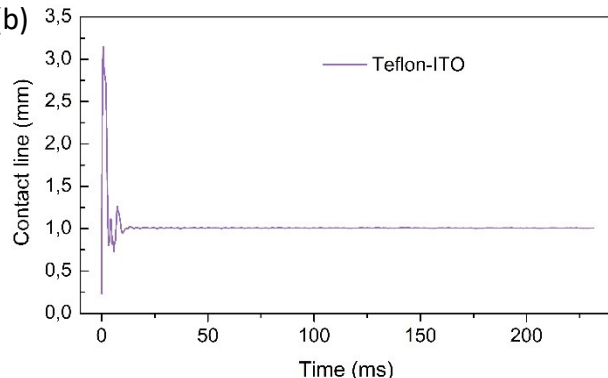

(c)

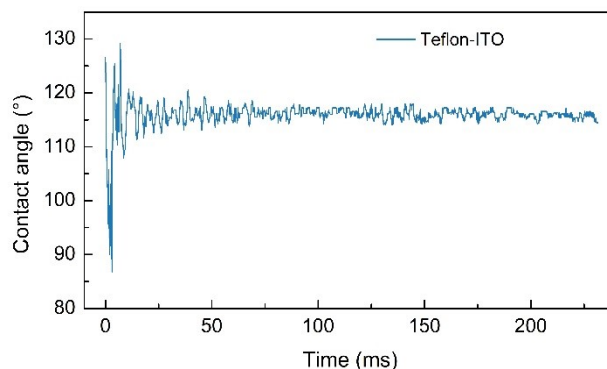

Fig. S1. (a) Experimental snapshots of a liquid jet impacting a hydrophobic Teflon-ITO surface. (b) Contact line diameter over time for the case (a). (c) Contact angle as a function of time. Oscillations are more pronounced in comparison to a hydrophilic

surface. The droplet can even slide over the surface. Pressure: 350 mbar. Scale bar represents 1 mm. See also Video 3.

## 2. SUD angle as a function of pressure

The SUD angle is independent of the applied liquid jet pressure. Of course, this is only possible when the pressure and volume of the liquid jet are sufficiently high to allow a dominant and clear receding motion of the contact line prior the formation of the SUD drop.

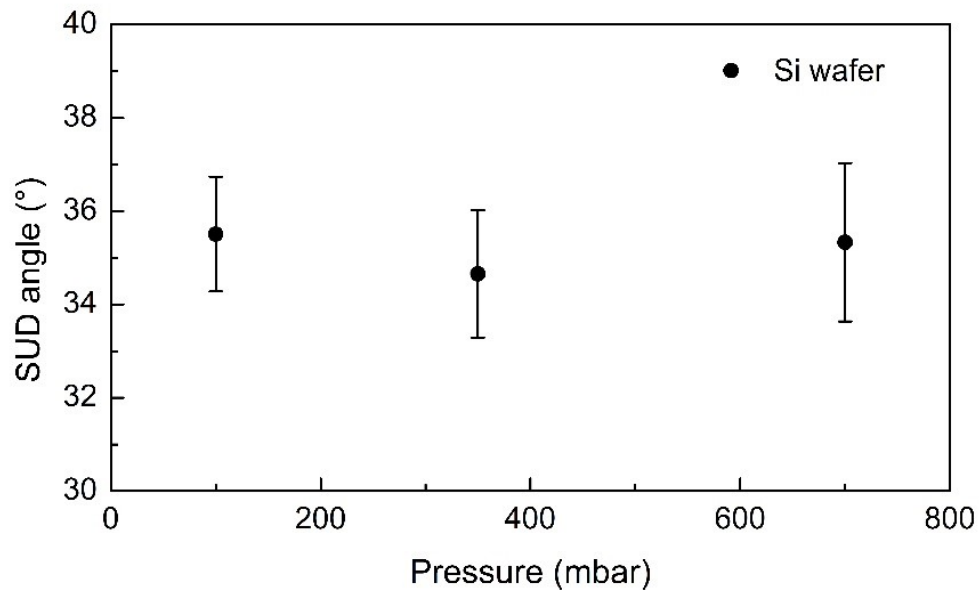

Fig. S2. SUD angle as a function of the pressure of the liquid jet impacting a Si wafer surface. Sud angle remains unaltered when the pressure is changed.

### 3. SUD for a hydrophilic bare glass slide

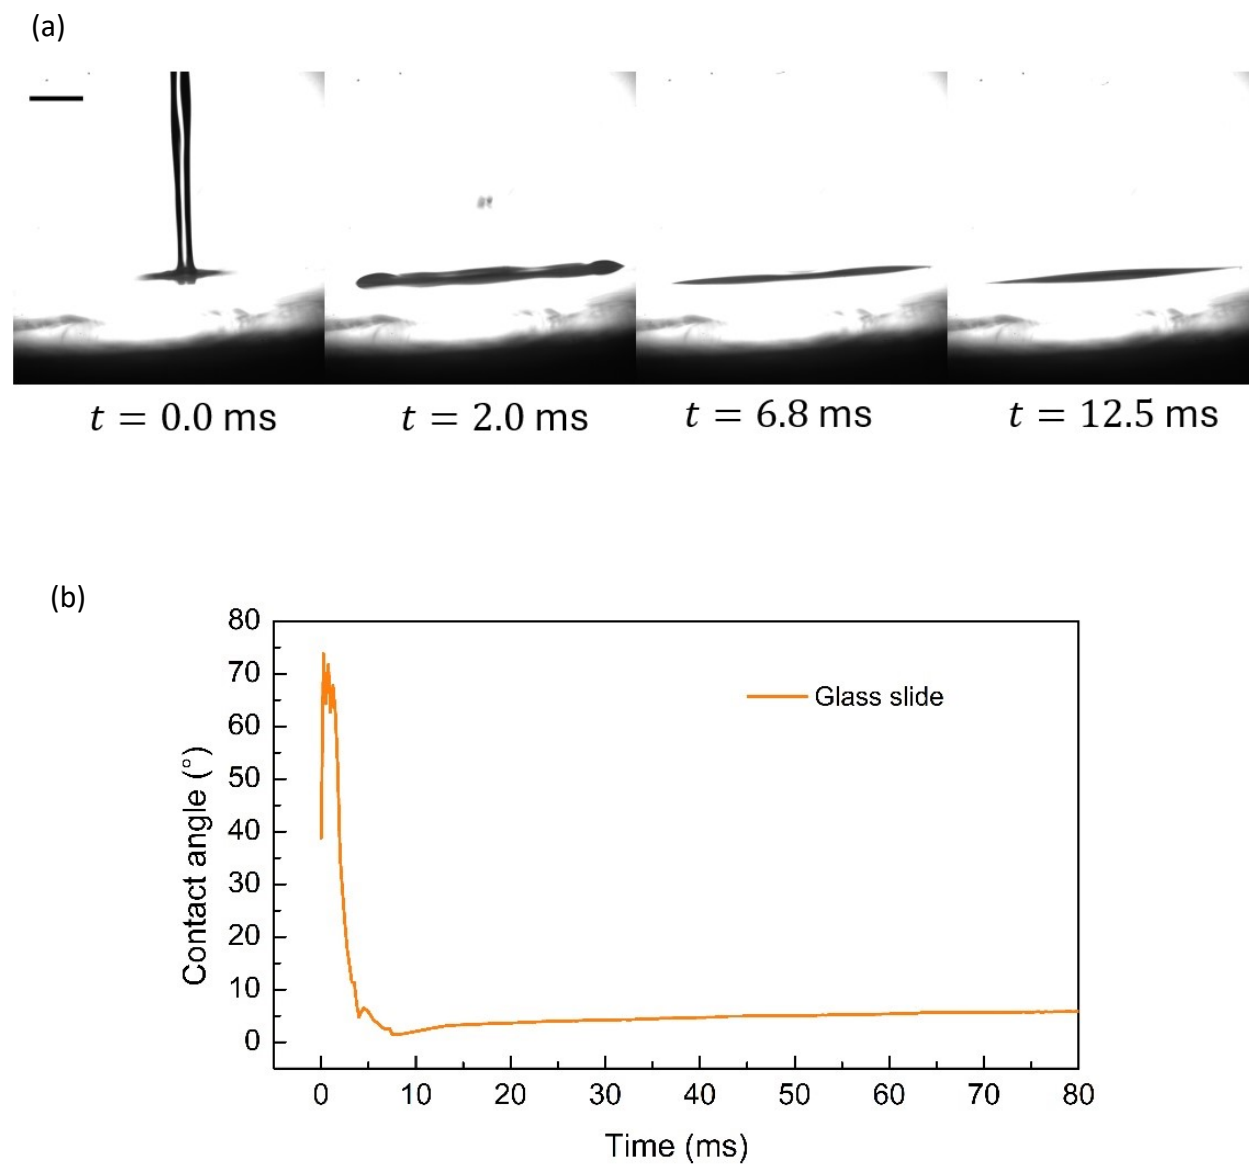

Fig. S3. (a) Experimental snapshots of a liquid jet impacting a bare glass slide. (b) Contact angle as a function of time for a Glass slide. SUD angle value is  $6^{\circ}$ . Scale bar represents 1 mm. See also Video 4.

#### 4. SUD for a superhydrophobic surface

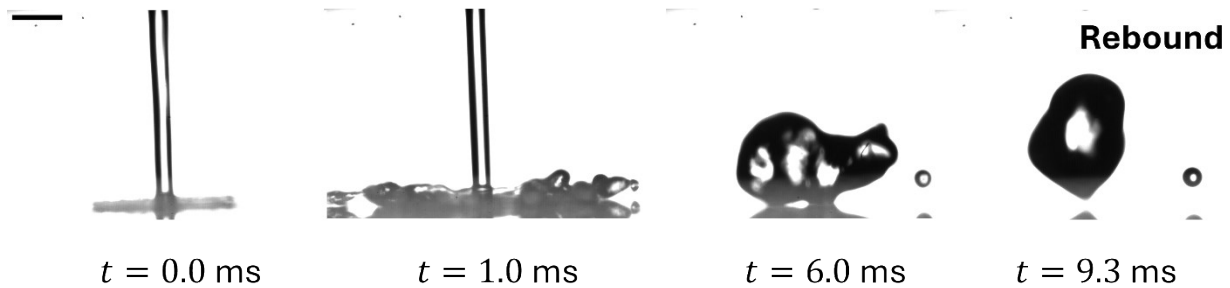

Fig. S4. Liquid jet of water impacting a superhydrophobic surface made of silicone nanofilaments. The liquid experience breakup upon impact and pronounced oscillations during the receding phase until it completely rebounds from the surface. Scale bar represents 1mm. See also Video 5.

#### Supplemental Videos

Video 1. Liquid jet impacting a silica surface. Dosing pressure: 350 mbar, jetting time 5 ms

Video 2. Bottom view of a liquid jet impacting a PMMA surface. Dosing pressure: 350 mbar, jetting time: 1 ms.

Video 3. Liquid jet impacting a hydrophobic Teflon surface. Dosing pressure: 350 mbar, jetting time 1 ms

Video 4. Liquid jet impacting a Glass surface. Dosing pressure: 350 mbar, jetting time 1 ms.

Video 5. Liquid jet impacting a superhydrophobic surface. Dosing pressure: 350 mbar, jetting time 1 ms
